# Supplementary material for: Electrochemical analysis of glyphosate using porous biochar surface corrosive nZVI nanoparticles
Source: Royal Society of Chemistry journal article supplement (doi:10.1039/d2na00610c), 2023-01-01
Supplement: d2na00610c1.pdf [file d2na00610c1.pdf]

## Supporting Information File

### **Electrochemical analysis of glyphosate using porous biochar surface corrosive nZVI nanoparticles**

*Aaliya Qureashi<sup>1</sup>, Altaf Hussain Pandith<sup>1\*</sup>, Arshid Bashir<sup>1</sup>, Lateef Ahmad Malik<sup>1</sup>, Taniya Manzoor<sup>1</sup>, Faheem A Sheikh<sup>2</sup>, KanizFatima<sup>1</sup>, Zia-ul-Haq<sup>1</sup>*

*<sup>1</sup>Laboratory of Nanoscience and Quantum Computations, Department of Chemistry, University of Kashmir, Hazratbal, Srinagar, J&K, India*

*<sup>2</sup>Department of Nanotechnology, University of Kashmir, Srinagar-190006, Kashmir, India*

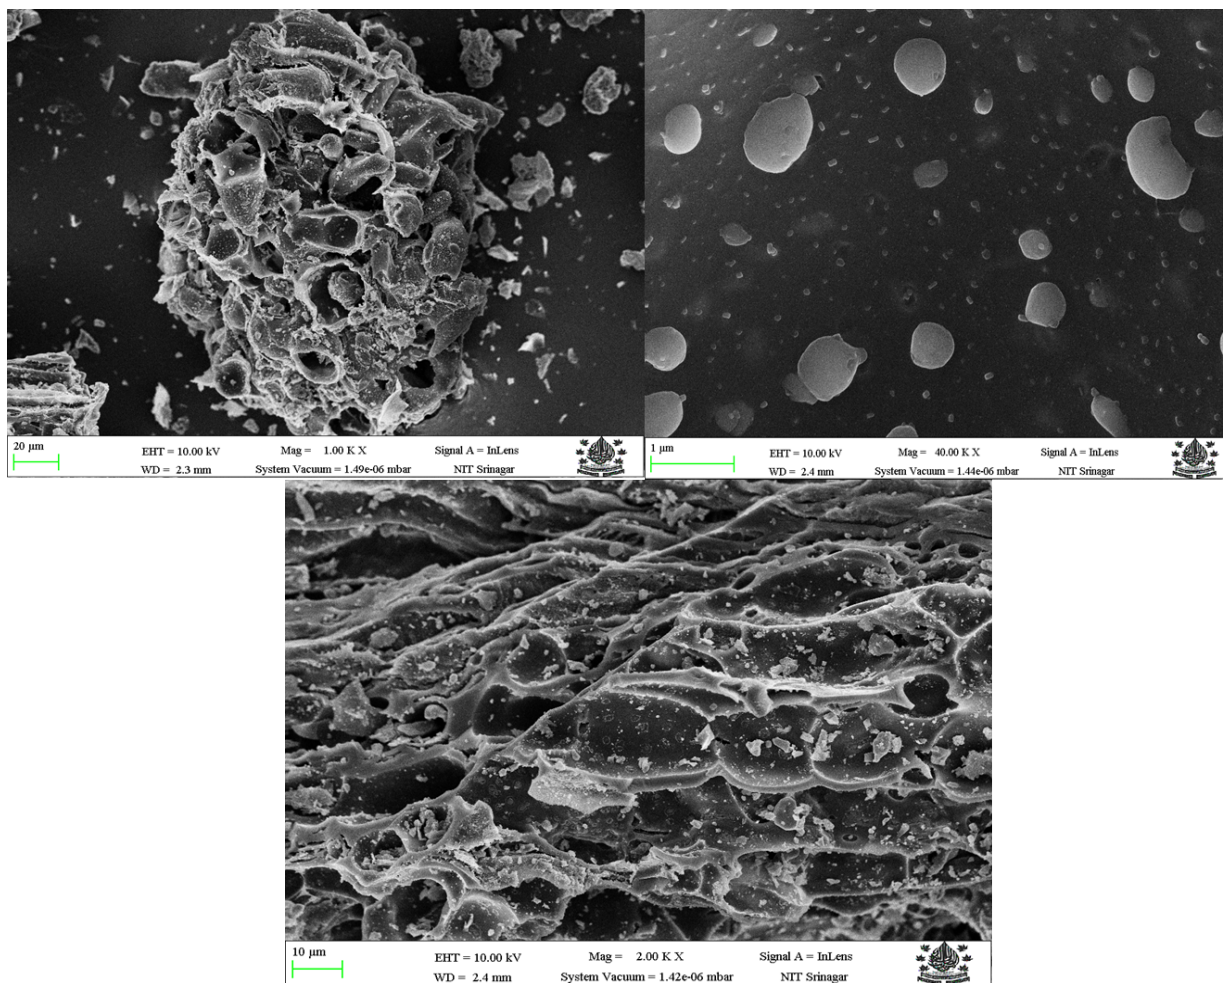

**Figure S1:** SEM Images of nZVI@Biochar nanocomposite.

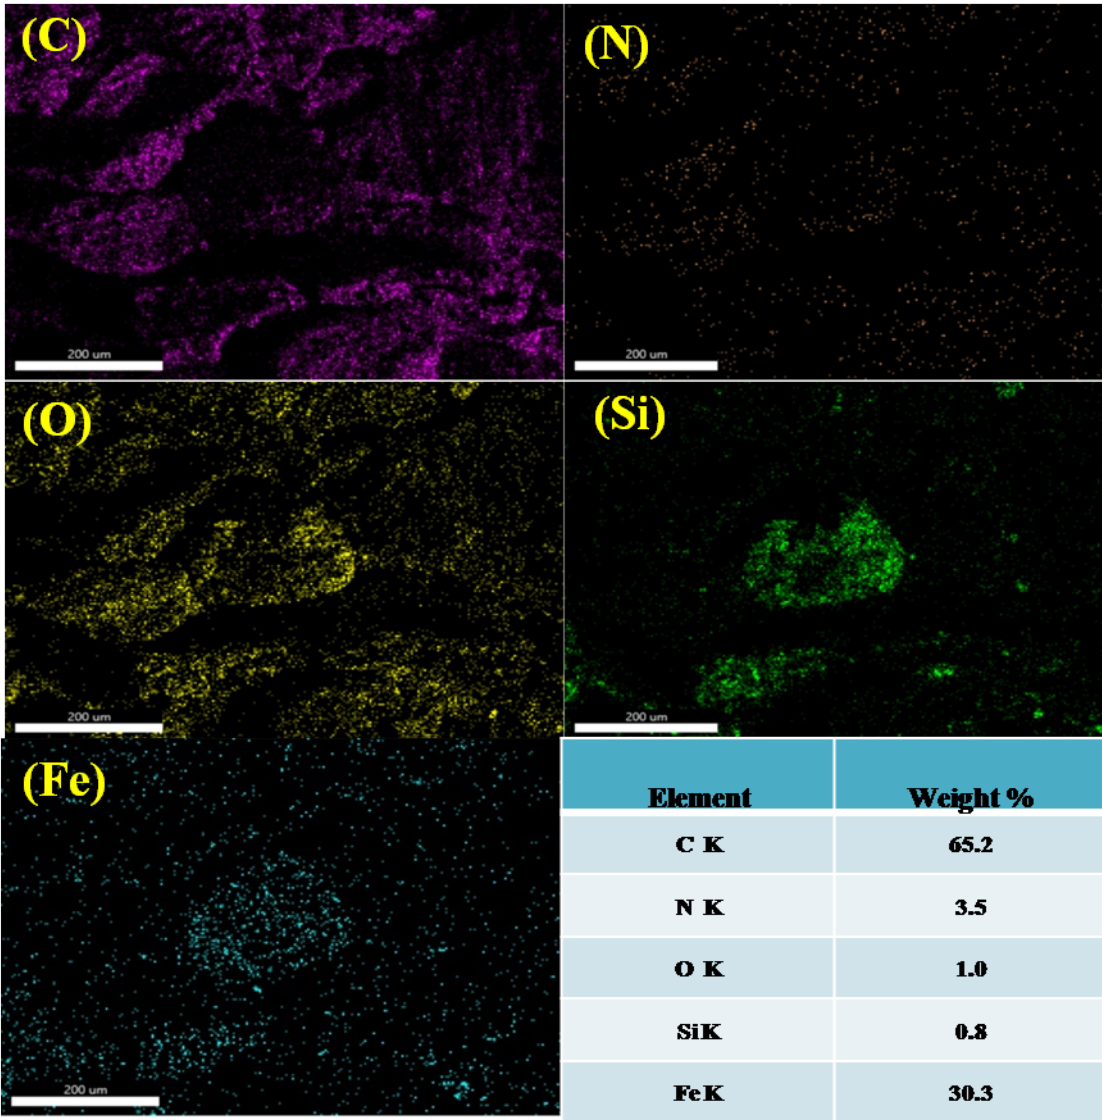

**Figure S2:** Elemental analysis of synthesized material with the corresponding weight percentage of different elements.

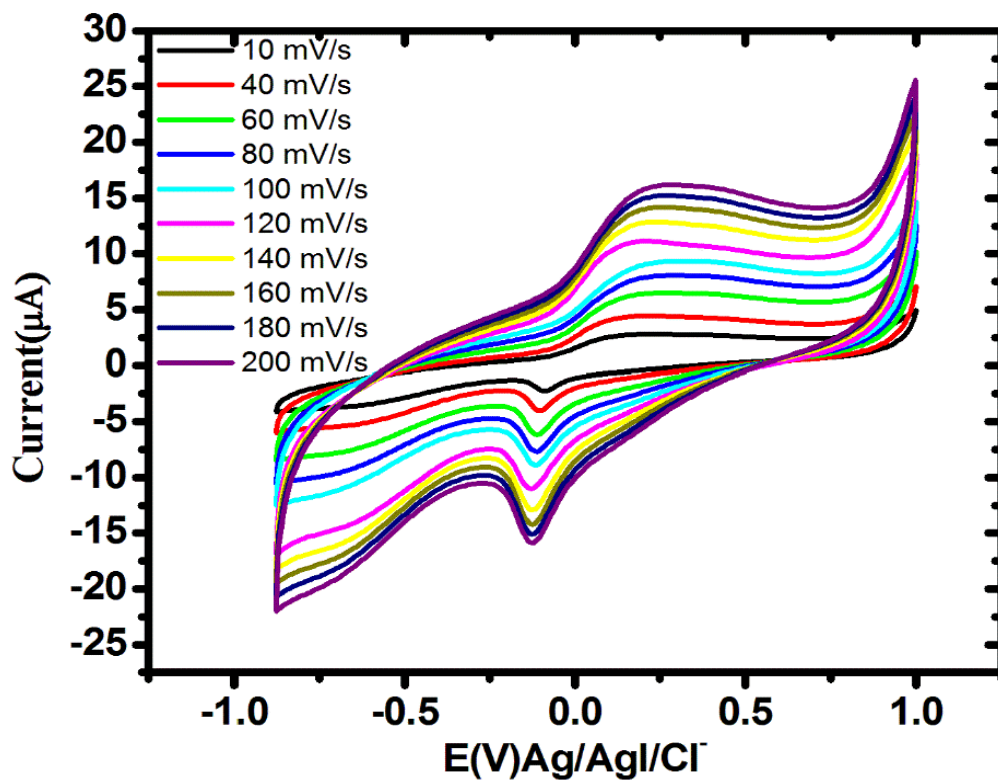

**Figure S3:** Cyclic voltammogram of fnZVI@Biochar with increase in concentrations of Glyphosate.

**Table T1:** Cartesian coordinates of optimized Geometries

| <b>Cartesian Coordinates (Angstroms) of Biochar-Glyphosate</b> |               |               |           |           |           |
|----------------------------------------------------------------|---------------|---------------|-----------|-----------|-----------|
| <b>S.No.</b>                                                   | <b>At.No.</b> | <b>Symbol</b> | <b>X</b>  | <b>Y</b>  | <b>Z</b>  |
| 1                                                              | 6             | C             | 6.293126  | 0.605730  | -0.419871 |
| 2                                                              | 6             | C             | 5.312027  | -0.407483 | -1.038288 |
| 3                                                              | 6             | C             | 3.078802  | -1.282638 | -0.942340 |
| 4                                                              | 8             | O             | 7.325320  | 1.183448  | -1.223437 |
| 5                                                              | 8             | O             | 6.186494  | 0.925279  | 0.792601  |
| 6                                                              | 8             | O             | 1.656485  | -1.475832 | 1.369009  |
| 7                                                              | 8             | O             | 0.846182  | 0.412345  | -0.268733 |
| 8                                                              | 8             | O             | 0.383933  | -2.293791 | -0.779376 |
| 9                                                              | 7             | N             | 4.015303  | -0.315475 | -0.352035 |
| 10                                                             | 15            | P             | 1.473336  | -1.168727 | -0.092691 |
| 11                                                             | 1             | H             | 0.729339  | 0.608266  | -1.201236 |
| 12                                                             | 1             | H             | -0.462909 | -2.233702 | -0.331215 |
| 13                                                             | 1             | H             | 4.137011  | -0.519553 | 0.619325  |
| 14                                                             | 1             | H             | 3.471231  | -2.271963 | -0.832181 |
| 15                                                             | 1             | H             | 2.948574  | -1.064273 | -1.981693 |
| 16                                                             | 1             | H             | 5.181801  | -0.189116 | -2.077643 |
| 17                                                             | 1             | H             | 5.704452  | -1.396809 | -0.928130 |
| 18                                                             | 1             | H             | 7.028368  | 1.238603  | -2.134688 |
| 19                                                             | 6             | C             | -1.207512 | -1.375197 | 3.405262  |
| 20                                                             | 6             | C             | -1.562118 | -1.726489 | 2.091198  |
| 21                                                             | 6             | C             | -1.736944 | -0.728429 | 1.135357  |
| 22                                                             | 6             | C             | -1.560371 | 0.608550  | 1.484114  |

|    |   |   |           |           |           |
|----|---|---|-----------|-----------|-----------|
| 23 | 6 | C | -1.208972 | 0.947468  | 2.788711  |
| 24 | 6 | C | -1.034654 | -0.066349 | 3.746681  |
| 25 | 6 | C | -2.088343 | -1.067347 | -0.169240 |
| 26 | 6 | C | -1.735197 | 1.606610  | 0.528273  |
| 27 | 6 | C | -2.086595 | 1.267692  | -0.776325 |
| 28 | 6 | C | -2.263169 | -0.069286 | -1.125081 |
| 29 | 6 | C | -2.261421 | 2.265753  | -1.732165 |
| 30 | 6 | C | -2.081147 | 3.612286  | -1.371241 |
| 31 | 6 | C | -1.737142 | 3.944073  | -0.094093 |
| 32 | 6 | C | -1.558623 | 2.943589  | 0.877029  |
| 33 | 6 | C | -1.204031 | 3.276305  | 2.195923  |
| 34 | 6 | C | -1.032884 | 2.299244  | 3.131652  |
| 35 | 1 | H | -0.762955 | 2.563119  | 4.132856  |
| 36 | 1 | H | -1.067600 | 4.302304  | 2.467241  |
| 37 | 1 | H | -1.072420 | -2.139317 | 4.141992  |
| 38 | 1 | H | -0.764730 | 0.190455  | 4.749723  |
| 39 | 1 | H | -2.214640 | 4.381481  | -2.102965 |
| 40 | 1 | H | -1.602304 | 4.972067  | 0.170380  |
| 41 | 6 | C | -1.742392 | -3.073022 | 1.730274  |
| 42 | 6 | C | -2.086398 | -3.404810 | 0.453126  |
| 43 | 6 | C | -2.264916 | -2.404325 | -0.517996 |
| 44 | 1 | H | -1.608900 | -3.842217 | 2.461998  |
| 45 | 1 | H | -2.221235 | -4.432804 | 0.188652  |
| 46 | 6 | C | -2.619508 | -2.737042 | -1.836890 |
| 47 | 6 | C | -2.790656 | -1.759981 | -2.772620 |
| 48 | 6 | C | -2.614568 | -0.408204 | -2.429678 |

|    |   |   |           |           |           |
|----|---|---|-----------|-----------|-----------|
| 49 | 1 | H | -2.755939 | -3.763041 | -2.108209 |
| 50 | 1 | H | -3.060585 | -2.023856 | -3.773823 |
| 51 | 6 | C | -2.616028 | 1.914460  | -3.046229 |
| 52 | 1 | H | -2.751119 | 2.678580  | -3.782959 |
| 53 | 6 | C | -2.788886 | 0.605612  | -3.387648 |
| 54 | 1 | H | -3.058809 | 0.348808  | -4.390690 |

**Cartesian Coordinates (Angstroms) of nZVI@Biochar**

| S.No. | At.No. | Symbol | X         | Y         | Z         |
|-------|--------|--------|-----------|-----------|-----------|
| 1     | 26     | Fe     | -0.256649 | -2.900482 | 0.340174  |
| 2     | 26     | Fe     | -2.447969 | -2.396479 | 0.459128  |
| 3     | 26     | Fe     | -1.600026 | -0.141543 | 0.867490  |
| 4     | 26     | Fe     | -0.412277 | 0.873555  | -0.921268 |
| 5     | 26     | Fe     | 0.603688  | -0.842286 | 0.315954  |
| 6     | 26     | Fe     | -1.218481 | -1.225205 | -1.185844 |
| 7     | 6      | C      | -1.870411 | 1.525807  | 3.124198  |
| 8     | 6      | C      | -0.614278 | 0.910795  | 2.845194  |
| 9     | 6      | C      | -0.592020 | -0.457540 | 2.456455  |
| 10    | 6      | C      | -1.814335 | -1.190533 | 2.351501  |
| 11    | 6      | C      | -3.053394 | -0.551790 | 2.635786  |
| 12    | 6      | C      | -3.046225 | 0.820727  | 3.023245  |
| 13    | 6      | C      | 0.652654  | -1.099097 | 2.170905  |
| 14    | 6      | C      | -1.791976 | -2.565055 | 1.961004  |
| 15    | 6      | C      | -0.547302 | -3.206613 | 1.675454  |

|    |   |   |           |           |          |
|----|---|---|-----------|-----------|----------|
| 16 | 6 | C | 0.675013  | -2.473619 | 1.780408 |
| 17 | 6 | C | -0.525043 | -4.574947 | 1.286715 |
| 18 | 6 | C | -1.759666 | -5.282278 | 1.190047 |
| 19 | 6 | C | -2.956988 | -4.665155 | 1.464726 |
| 20 | 6 | C | -3.008774 | -3.294824 | 1.856501 |
| 21 | 6 | C | -4.236303 | -2.629484 | 2.147341 |
| 22 | 6 | C | -4.257811 | -1.307267 | 2.522977 |
| 23 | 1 | H | -5.203432 | -0.817972 | 2.740452 |
| 24 | 1 | H | -5.164875 | -3.188243 | 2.067067 |
| 25 | 1 | H | -1.885455 | 2.571067  | 3.420989 |
| 26 | 1 | H | -3.993434 | 1.307232  | 3.240063 |
| 27 | 1 | H | -1.740706 | -6.327392 | 0.892970 |
| 28 | 1 | H | -3.887237 | -5.221246 | 1.385347 |
| 29 | 6 | C | 0.620344  | 1.618125  | 2.941862 |
| 30 | 6 | C | 1.817667  | 1.001003  | 2.667183 |
| 31 | 6 | C | 1.869452  | -0.369329 | 2.275409 |
| 32 | 1 | H | 0.601384  | 2.663239  | 3.238939 |
| 33 | 1 | H | 2.747916  | 1.557093  | 2.746562 |
| 34 | 6 | C | 3.096982  | -1.034669 | 1.984569 |
| 35 | 6 | C | 3.118490  | -2.356886 | 1.608932 |
| 36 | 6 | C | 1.914072  | -3.112362 | 1.496123 |
| 37 | 1 | C | 4.025554  | -0.475909 | 2.064842 |
| 38 | 1 | C | 4.064110  | -2.846180 | 1.391457 |
| 39 | 6 | H | 0.731089  | -5.189959 | 1.007711 |
| 40 | 1 | H | 0.746134  | -6.235219 | 0.710921 |



|    |   |   |          |           |          |
|----|---|---|----------|-----------|----------|
| 41 | 6 | C | 1.906904 | -4.484880 | 1.108664 |
| 42 | 1 | H | 2.854113 | -4.971385 | 0.891846 |

**Cartesian Coordinates (Angstroms) of nZVI@Biochar-Glyphosate**

| S.No. | At.No. | SYMBOL | X         | Y         | Z         |
|-------|--------|--------|-----------|-----------|-----------|
| 1     | 26     | Fe     | 1.401967  | 1.600475  | -0.561590 |
| 2     | 26     | Fe     | 2.148420  | -0.153028 | -1.760793 |
| 3     | 26     | Fe     | 1.069799  | -1.441533 | 0.013141  |
| 4     | 26     | Fe     | -1.291481 | -1.240108 | 0.170010  |
| 5     | 26     | Fe     | 0.070754  | 0.535103  | 0.877086  |
| 6     | 26     | Fe     | -0.189988 | -0.068058 | -1.423030 |
| 7     | 6      | C      | 2.171017  | -3.229228 | 1.893928  |
| 8     | 6      | C      | 1.730217  | -1.940395 | 2.316488  |
| 9     | 6      | C      | 2.056329  | -0.808506 | 1.518723  |
| 10    | 6      | C      | 2.812792  | -0.974822 | 0.317701  |
| 11    | 6      | C      | 3.239706  | -2.272357 | -0.080079 |
| 12    | 6      | C      | 2.898694  | -3.389241 | 0.738614  |
| 13    | 6      | C      | 1.627460  | 0.494842  | 1.918353  |
| 14    | 6      | C      | 3.140379  | 0.162185  | -0.483671 |
| 15    | 6      | C      | 2.711510  | 1.465532  | -0.084041 |
| 16    | 6      | C      | 1.955047  | 1.631849  | 1.116980  |
| 17    | 6      | C      | 3.037623  | 2.597422  | -0.881806 |
| 18    | 6      | C      | 3.793574  | 2.402433  | -2.075319 |
| 19    | 6      | C      | 4.206134  | 1.148692  | -2.459763 |
| 20    | 6      | C      | 3.893448  | -0.003313 | -1.679321 |

|    |   |   |           |           |           |
|----|---|---|-----------|-----------|-----------|
| 21 | 6 | C | 4.308386  | -1.315359 | -2.054096 |
| 22 | 6 | C | 3.993264  | -2.409099 | -1.283218 |
| 23 | 1 | H | 4.318627  | -3.400834 | -1.585715 |
| 24 | 1 | H | 4.883529  | -1.440141 | -2.967629 |
| 25 | 1 | H | 1.920979  | -4.092643 | 2.504563  |
| 26 | 1 | H | 3.225492  | -4.379691 | 0.433467  |
| 27 | 1 | H | 4.041730  | 3.268180  | -2.683412 |
| 28 | 1 | H | 4.781412  | 1.020680  | -3.372762 |
| 29 | 6 | C | 0.974265  | -1.745407 | 3.510000  |
| 30 | 6 | C | 0.561705  | -0.491665 | 3.894444  |
| 31 | 6 | C | 0.874391  | 0.660339  | 3.114003  |
| 32 | 1 | H | 0.726109  | -2.611154 | 4.118094  |
| 33 | 1 | H | -0.013573 | -0.363653 | 4.807445  |
| 34 | 6 | C | 0.459454  | 1.972386  | 3.488778  |
| 35 | 6 | C | 0.774575  | 3.066126  | 2.717900  |
| 36 | 6 | C | 1.528133  | 2.929382  | 1.514761  |
| 37 | 1 | H | -0.115690 | 2.097168  | 4.402311  |
| 38 | 1 | H | 0.449212  | 4.057860  | 3.020396  |
| 39 | 6 | C | 2.596823  | 3.886255  | -0.459246 |
| 40 | 1 | H | 2.846860  | 4.749670  | -1.069881 |
| 41 | 6 | C | 1.869145  | 4.046268  | 0.696068  |
| 42 | 1 | H | 1.542347  | 5.036717  | 1.001214  |
| 43 | 6 | C | -7.156547 | 1.995355  | -0.423687 |
| 44 | 6 | C | -7.049029 | 0.483394  | -0.587249 |
| 45 | 6 | C | -5.398903 | -1.277548 | -0.871518 |
| 46 | 8 | O | -8.415415 | 2.477879  | -0.261390 |

|    |    |   |           |           |           |
|----|----|---|-----------|-----------|-----------|
| 47 | 8  | O | -6.220773 | 2.739291  | -0.480527 |
| 48 | 8  | O | -2.659829 | -0.773590 | -1.066295 |
| 49 | 8  | O | -3.497615 | -1.955726 | 1.050186  |
| 50 | 8  | O | -3.635972 | -3.229054 | -1.166251 |
| 51 | 7  | N | -5.695988 | 0.037359  | -0.334594 |
| 52 | 15 | P | -3.659457 | -1.730266 | -0.546113 |
| 53 | 1  | H | -3.920831 | -2.752911 | 1.389841  |
| 54 | 1  | H | -2.774590 | -3.478696 | -1.541491 |
| 55 | 1  | H | -5.031687 | 0.740290  | -0.647590 |
| 56 | 1  | H | -5.540455 | -1.366228 | -1.962626 |
| 57 | 1  | H | -6.043634 | -2.029904 | -0.403729 |
| 58 | 1  | H | -7.745110 | -0.018440 | 0.097660  |
| 59 | 1  | H | -7.399954 | 0.260425  | -1.614195 |
| 60 | 1  | H | -9.053999 | 1.758128  | -0.185704 |

---

**Table T2:** Band gap energy values of prepared materials

| Molecules               | HOMO     | LUMO     | H-L GAP |
|-------------------------|----------|----------|---------|
| Biochar-Glyphosate      | -5.51 eV | -1.36 eV | 4.15 eV |
| nZVI@Biochar            | -3.44 eV | -2.05 eV | 1.39 eV |
| nZVI@Biochar-glyphosate | -3.61 eV | -1.99 eV | 1.62 eV |

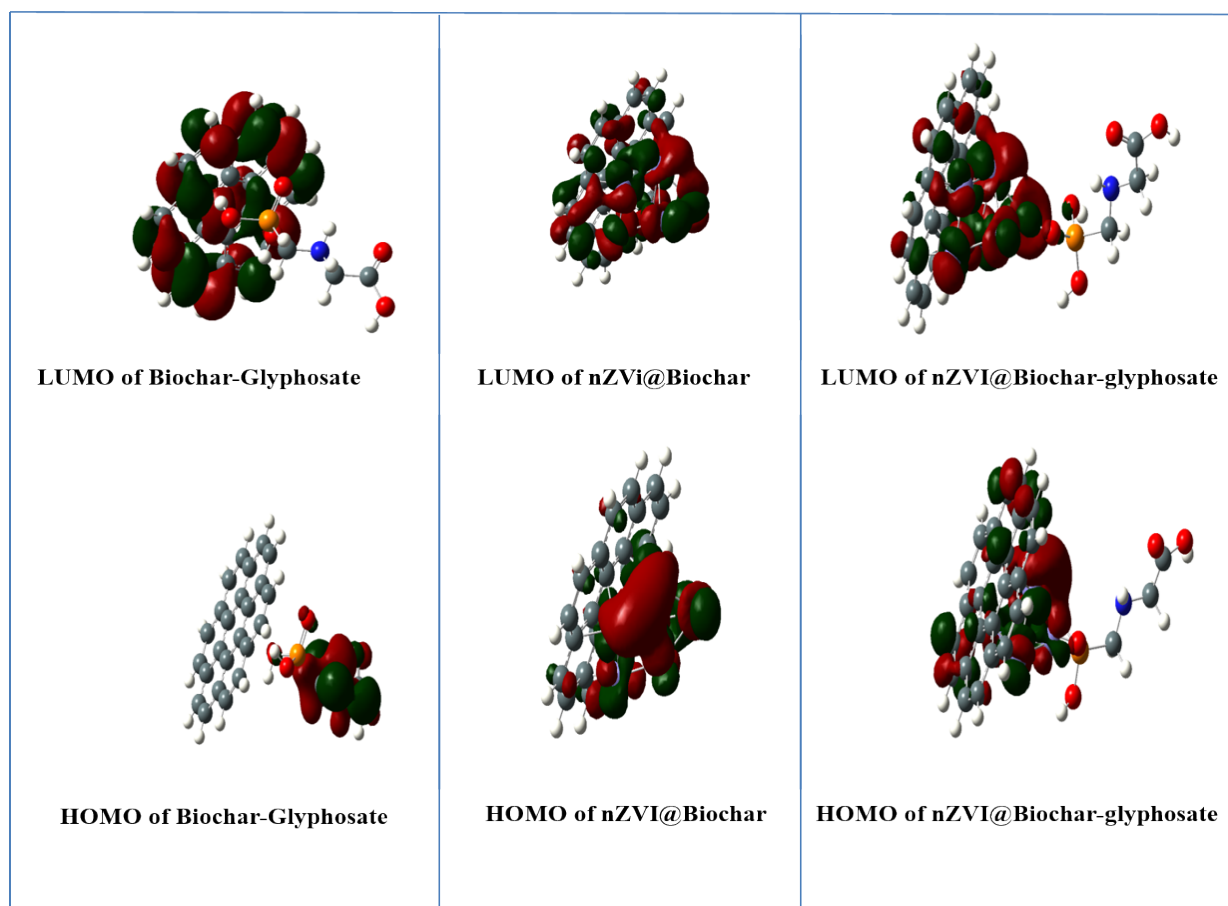

**Figure S4:** Various orientations of HOMO-LUMO for the prepared materials.

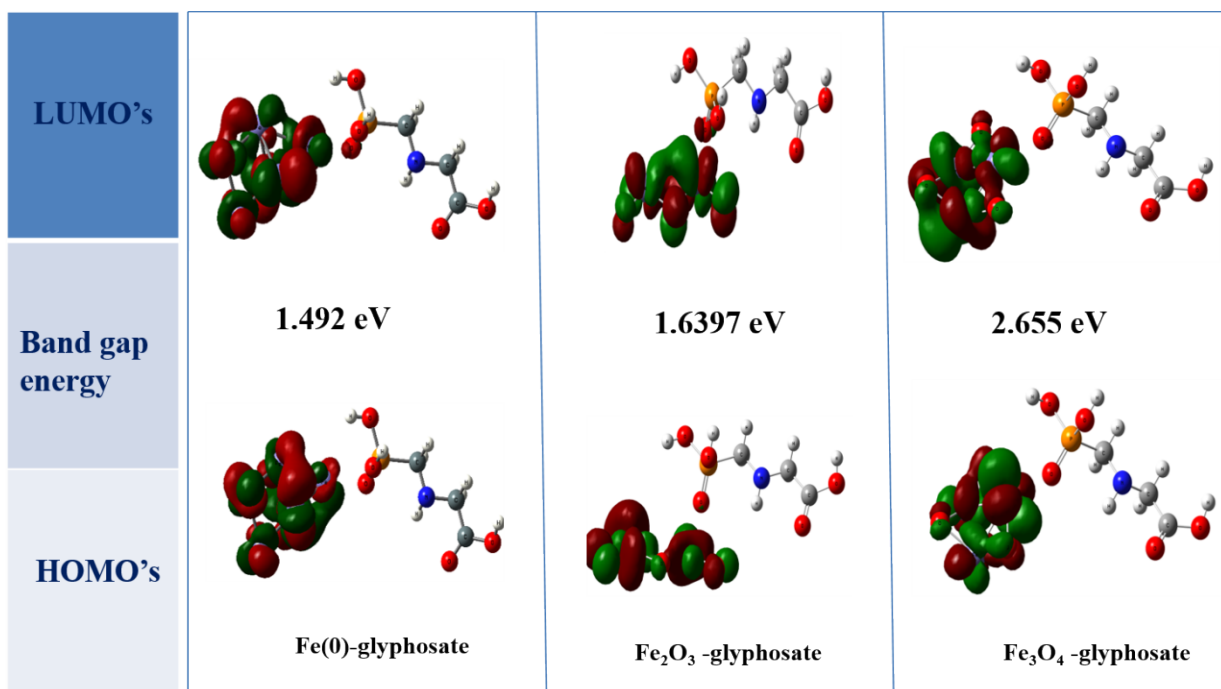

**Figure S5:** Band gap energy values of Fe(0), Fe<sub>2</sub>O<sub>3</sub> and Fe<sub>3</sub>O<sub>4</sub> with glyphosate.

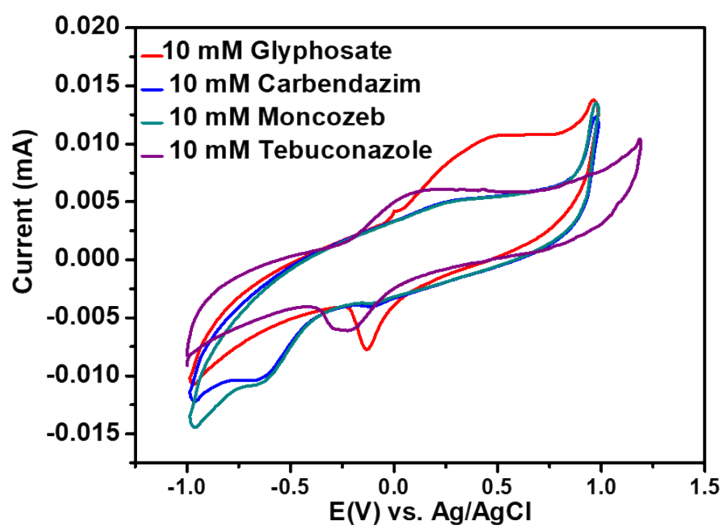

**Figure S6:** Cyclic voltammograms of nZVI@Biochar 0.1M KNO<sub>3</sub> with 10 mM concentration of different molecules.
